# Supplementary material
Source: MDPI journal article supplement (https://www.mdpi.com/2076-3417/13/18/10549)
Supplement: s1 [file s1]

Supplementary information

Table S1. BET surface area of RH-BC and WD-BC

| Biochar | BET surface area (m <sup>2</sup> /g) |
|---------|--------------------------------------|
| WD-BC   | 211.14                               |
| RH-BC   | 205.60                               |

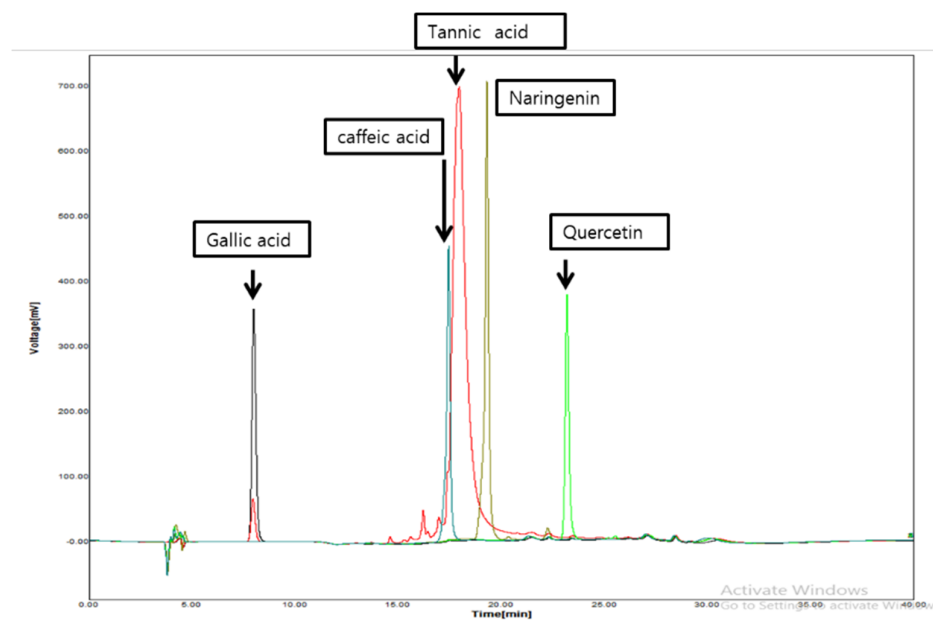

Figure S1. HPLC spectra of authentic polyphenols for polyphenols analysis.

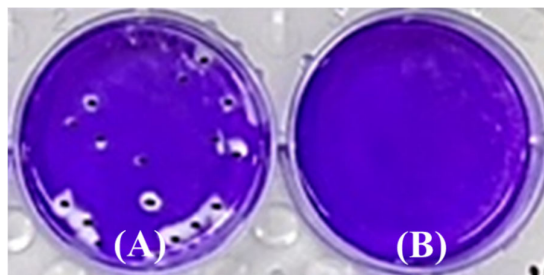

Figure S2. Inhibitory effects of RH-BC (A) without *C. myrrha* (T.Nees) Engl. resin extracts, and RH-BC (B) coated with *C. myrrha* (T.Nees) Engl. resin extracts against the H1N1 influenza virus using plaque assay.

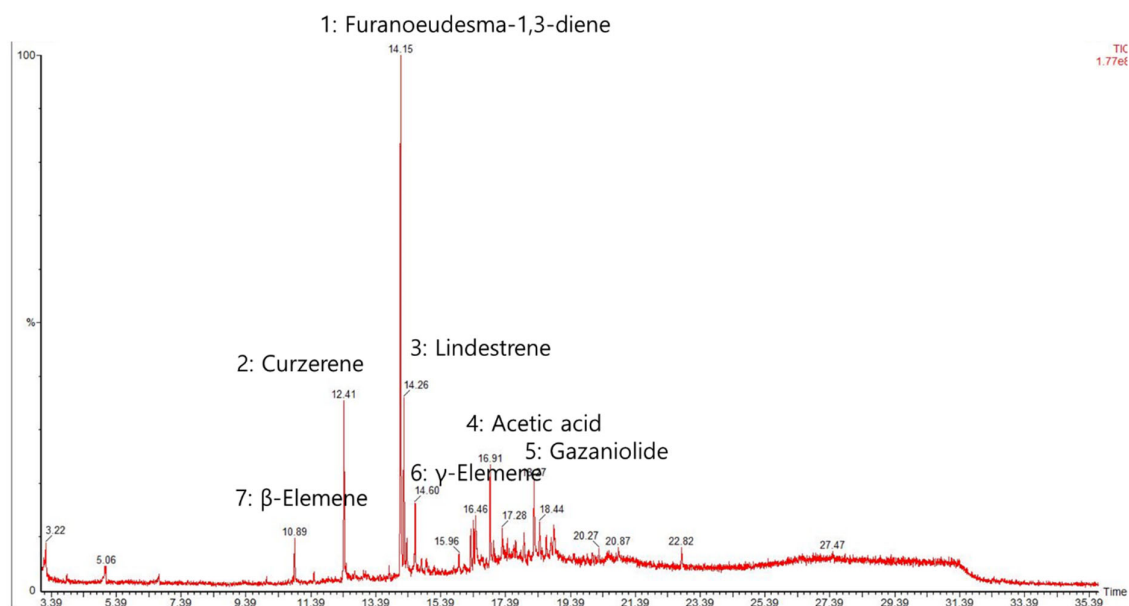

Figure S3. GC-MS spectra of *C. myrrha* (T.Nees) Engl. resin extracts for terpenoids analysis.

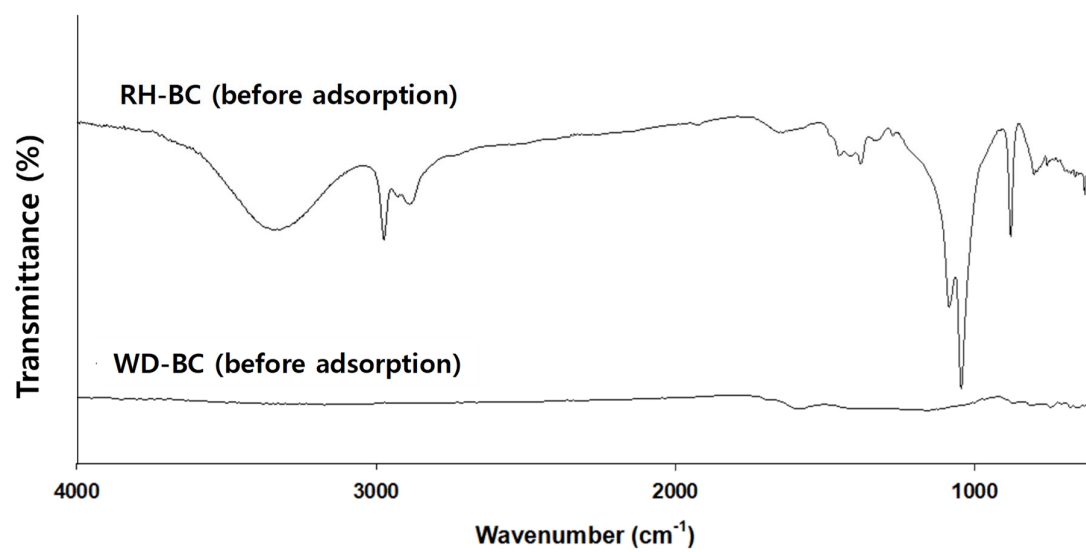

Figure S4. FTIR spectra of RH-BC and WD-BC before *C. myrrha* (T.Nees) Engl. resin extracts adsorption.
